# Supplementary material
Source: PubMed Central journal article supplement (PMC3172885)
Supplement: supp_184_2_191__1.pdf [file supp_184_2_191__1.pdf]

**DNA methylation in the ARG-NOS pathway is associated with exhaled nitric oxide in asthmatic children**

Carrie V. Breton, ScD, Hyang-Min Byun, PhD, Xinhui Wang, MS, Muhammad T. Salam,

MBBS, PhD , Kim Siegmund, PhD and Frank D. Gilliland, MD, PhD

Online Data Supplement

### ***Sample Collection for FeNO, Transport, and Analysis***

Details of the protocol have been published elsewhere (1-2). Exhaled breath collection was performed at schools, usually from midmorning to noon to avoid traffic-related peaks of ambient NO and possible effects of recent eating on FeNO. Each community was visited at least twice in different seasons, to minimize confounding of location and season effects. Health status at testing was evaluated by a brief questionnaire; subjects with symptoms of acute respiratory infection within the past 3 days were excluded or rescheduled. FeNO was collected in Mylar bags after discarding dead space air (1), using a commercial apparatus (Sievers Division, GE Analytical Instruments, Boulder, CO), with target expiratory flow of 100 ml/sec. Ambient air samples, collected similarly, were used to estimate each subject's ambient NO exposure at the time of testing. Samples were stored in coolers and transported to a central laboratory for NO analysis. Between collection and analysis, the samples were transported on “blue ice” at 2 to 8 degree C. Lag time between collection and analysis ranged from 2 to 26 hours (1-2). Potential sources of measurement artifact were documented and tested statistically for influence on the results.

### ***Buccal Sample Collection and Processing***

Children were provided with two toothbrushes and instructed to brush their teeth with the first one. They were instructed to gently brush the buccal mucosa with the second toothbrush. The brush was then placed in a leak proof container that was filled with an alcohol-based fixative. Children then swished liquid throughout their mouths and expelled the fluid into a container. The majority of buccal cell specimens were collected at school under the supervision of study staff. The remaining specimens were collected at home and sent to us by mail.

Buccal cell suspensions were centrifuged at 2,000g on the day they were received in the laboratory. The pellets were stored frozen at  $-80^{\circ}\text{C}$  until used for DNA extraction, at which time they were resuspended and incubated in 600  $\mu\text{l}$  of lysis solution from a PUREGENE DNA isolation kit (cat #D-5000; GENTRA, Minneapolis, MN) containing 100  $\mu\text{g}/\text{ml}$  proteinase K overnight at  $55^{\circ}\text{C}$ . DNA extraction was performed according to manufacturer's recommendations. The DNA samples were resuspended in the hydration solution (GENTRA) and stored at  $-80^{\circ}\text{C}$ .

### ***Selection of CpG loci in ARG/NOS genes***

We examined CpG loci located in the promoter regions of *NOS1*, *NOS2A*, *NOS3*, *ARG1* and *ARG2*. The CpG positions were located at the following sites: chr12:117,769,133-117,769,145 for *NOS1*, chr17: 26,127,518-26,127,523 for 'Non-CpG islands' in the promoter of *NOS2A*, chr17: 26,126,265-26,126,267 for 'non-CpG island' between exons 1 and 2 of *NOS2A*, chr17: 26,120,696-26,120,703 for 'CpG islands' of *NOS2A*, chr7:150,690,770-150,690,776 for *NOS3*, chr6:131,894,358-131,894,360 for *ARG1* and chr14:68,086,547-68,086,554 for *ARG2* according to assembly of GRCh37/hg19. Primers were designed using MethPrimer software, with parameters for selection including a product size of 100~300bp, 50~60 $^{\circ}\text{C}$  for primer  $T_m$ , and a primer size of 20~30bp.

### ***Pyrosequencing***

We used the Pyrosequencing assay using the HotMaster Mix (Eppendorf, Hamburg, Germany) and the PSQ HS 96 Pyrosequencing System (Biotage AB, Uppsala, Sweden) (3) as described in previous work (Byun HM, 2009, hMG) (4). As a quality control check to estimate the bisulfite conversion efficiency, we placed duplicate genomic DNA samples on each bisulfite

conversion plate to estimate the internal plate variation of bisulfite conversion and the Pyrosequencing reaction. Conversion efficiency was greater than 95%. We also added universal PCR products amplified from cell line DNA on each Pyrosequencing plate to check the run-to-run and plate-to-plate variation in performing Pyrosequencing reactions. In addition, the Pyrogram peak pattern from every sample was checked to confirm the quality of reaction.

## References

- E1. Linn WS, Berhane KT, Rappaport EB, Bastain TM, Avol EL, Gilliland FD. Relationships of online exhaled, offline exhaled, and ambient nitric oxide in an epidemiologic survey of schoolchildren. *J Expo Sci Environ Epidemiol* 2009;19:674-681.
- E2. Linn WS, Rappaport EB, Berhane KT, Bastain TM, Avol EL, Gilliland FD. Exhaled nitric oxide in a population-based study of southern california schoolchildren. *Respir Res* 2009;10:28.
- E3. Jirtle RL, Skinner MK. Environmental epigenomics and disease susceptibility. *Nat Rev Genet* 2007;8:253-262.
- E4. Byun HM, Siegmund KD, Pan F, Weisenberger DJ, Kanel G, Laird PW, Yang AS. Epigenetic profiling of somatic tissues from human autopsy specimens identifies tissue- and individual-specific DNA methylation patterns. *Hum Mol Genet* 2009;18:4808-4817.

**Tables**

**Table E1. Primer sequences and reaction conditions for NOS and ARG genes**

| Gene  | Primer         | Sequence                                                 | Annealing Temp | PCR size(bp) |
|-------|----------------|----------------------------------------------------------|----------------|--------------|
| NOS1  | PCR Forward    | NOS1-F:AGGTTGGTAATGAAGATATTTAGAGATAG                     | 56.7°C         | 223          |
|       | PCR Reverse    | NOS1-R(biotin) : TCACCCACTCATAACTAATAACCC                |                |              |
|       | PSQ sequencing | NOS1-SP:TTTTAGGGATA                                      |                |              |
| NOS2A | PCR Forward    | iNOS(23151743)-F: AAAAATAATTTTTTGGATGGTATGG              | TDOWN5<br>3    | 177          |
|       | PCR Reverse    | iNOS(23151567)-R(biotin): AA ACTATCTAAA ACTACCCAATCCC    |                |              |
|       | PSQ sequencing | iNOS(23151671)-SP:TTTATAATTTTGTAG                        |                |              |
| NOS2A | PCR Forward    | iNOS(23150425)-F: TTAGGGTTAGGTAAAGGTATTTTTGTTT           | TDOWN5<br>3    | 212          |
|       | PCR Reverse    | iNOS(23150214)-R(biotin): CAATTCTATAAAAACCACTAATAATCTTAA |                |              |
|       | PSQ sequencing | iNOS(23150395)-SP: TAAAGGTATTTTTGTTTTAA                  |                |              |
| NOS2A | PCR Forward    | iNOS(23145018)-F: GGAAGGTAGGGAAGGAGGGGTAGTT              | TNCTD          | 243          |
|       | PCR Reverse    | iNOS(23144776)-R(biotin): AAAAATCCTACAAAACAACCTACACAA CC |                |              |
|       | PSQ sequencing | iNOS(23144840)-SP: GAGGGGTTGGG                           |                |              |
| NOS3  | PCR Forward    | NOS3-F: GGATATTTGGGTTTTTATTTA                            | TDOWN5<br>3    | 187          |
|       | PCR Reverse    | NOS3-R(biotin): CAATAAAAAAAAAAACTCTCCA                   |                |              |
|       | PSQ sequencing | NOS3-SP: TGGGATAGGGG                                     |                |              |
| ARG1  | PCR Forward    | ARG1-F: GGAGTTAGTTGTTTTTATTAGA                           | 56.7°C         | 200          |
|       | PCR Reverse    | ARG1-R(biotin):TTTTTCCTTACCTATCCCTTTA                    |                |              |
| ARG2  | PSQ sequencing | ARG1-SP: TGTTAGAGTATGAG                                  | 56.7°C         | 274          |
|       | PCR Forward    | ARG2-F: GGAGAGTATAGGTTAGAGTG                             |                |              |
|       | PCR Reverse    | ARG2-R(biotin): AAAAACTACCCCTTAAAAAC                     |                |              |
|       | PSQ sequencing | ARG2-SP: GGGGTTGGTTGGAGG                                 |                |              |

**Table E2. Distribution of FeNO by participant characteristics**

|                                                    |                           | <b>N</b> | <b>Mean</b> | <b>SD</b> | <b>Median</b> | <b>Range</b> | <b>Wilcoxon<br/>p-value</b> |
|----------------------------------------------------|---------------------------|----------|-------------|-----------|---------------|--------------|-----------------------------|
| Overall                                            |                           | 940      | 14.6        | 14.4      | 9.8           | 114.3        |                             |
| Ever diagnosed<br>with asthma                      | No                        | 807      | 13.3        | 11.9      | 9.6           | 102.6        | 0.001                       |
|                                                    | Yes                       | 133      | 22.4        | 23.4      | 10.7          | 114.0        |                             |
| Ever reported<br>wheeze                            | No                        | 659      | 13.2        | 12.4      | 9.5           | 102.3        | 0.01                        |
|                                                    | Yes                       | 193      | 18.7        | 18.3      | 10.4          | 98.3         |                             |
| Use of asthma<br>medication                        | No                        | 793      | 13.5        | 12.4      | 9.6           | 102.6        | 0.0003                      |
|                                                    | Yes                       | 88       | 24.1        | 23.7      | 13.6          | 114.0        |                             |
| Sex                                                | Female                    | 489      | 14.5        | 14.1      | 10.2          | 114.0        | 0.29                        |
|                                                    | Male                      | 451      | 14.7        | 14.8      | 9.4           | 102.6        |                             |
| Ethnicity                                          | Non-<br>Hispanic<br>white | 333      | 13.9        | 14.1      | 9.6           | 102.0        | 0.16                        |
|                                                    | Hispanic<br>white         | 607      | 15.0        | 14.6      | 10.0          | 114.3        |                             |
| Exposed to<br>maternal<br>smoking <i>in utero</i>  | No                        | 859      | 14.6        | 14.4      | 9.7           | 114.3        | 0.96                        |
|                                                    | Yes                       | 51       | 16.0        | 18.3      | 9.8           | 88.5         |                             |
| Exposure to<br>paternal smoking<br><i>in utero</i> | No                        | 789      | 14.6        | 14.6      | 9.7           | 114.3        | 0.96                        |
|                                                    | Yes                       | 113      | 14.9        | 14.7      | 9.8           | 73.5         |                             |
| Exposure to<br>secondhand<br>smoke                 | No                        | 860      | 14.3        | 13.6      | 9.8           | 101.4        | 0.99                        |
|                                                    | Yes                       | 31       | 14.9        | 18.3      | 10.8          | 101.0        |                             |

**Table E3. Descriptive characteristics of the 488 selected compared to the 908 non-selected CHS participants from Year 3**

|                                              |                                  | <b>N=488</b>     | <b>N=908</b>     |                  |
|----------------------------------------------|----------------------------------|------------------|------------------|------------------|
| <b>Characteristics</b>                       |                                  | <b>Count (%)</b> | <b>Count (%)</b> | <b>p-value**</b> |
| FeNO (median)                                |                                  | 9.5              | 10.3             | 0.002            |
| Age (mean(SD))                               |                                  | 8.4 (0.7)        | 8.3 (0.7)        | 0.15             |
| Male                                         |                                  | 234 (48.0%)      | 446 (49.1%)      | 0.68             |
| Race/Ethnicity                               | Hispanic White                   | 315 (64.6%)      | 434 (58.4%)      | 0.03             |
|                                              | Non-Hispanic White               | 173 (35.5%)      | 309 (41.6%)      |                  |
| Exposed to maternal smoking <i>in utero</i>  |                                  | 36 (7.6%)        | 63 (7.5%)        | 0.93             |
| Exposure to paternal smoking <i>in utero</i> |                                  | 68 (14.6%)       | 142 (17.1%)      | 0.25             |
| Exposure to secondhand smoke                 |                                  | 21 (4.4%)        | 48 (5.5%)        | 0.41             |
| Ever diagnosed with asthma                   |                                  | 54 (11.1%)       | 59 (6.5%)        | 0.003            |
| Ever reported wheeze                         |                                  | 92 (20.0%)       | 164 (19.3%)      | 0.74             |
| History of respiratory allergy               |                                  | 242 (49.6%)      | 473 (52.2%)      | 0.36             |
| Use of asthma medication                     |                                  | 39 (8.3%)        | 62 (7.2%)        | 0.48             |
| Annual family income                         | ≤\$14,999                        | 62 (14.9%)       | 118 (15.7%)      | 0.27             |
|                                              | \$15,000-\$49,999                | 131 (31.4%)      | 266 (35.4%)      |                  |
|                                              | ≥\$50,000                        | 224 (53.7%)      | 368 (48.9%)      |                  |
| Parent/guardian education                    | Less than 12 <sup>th</sup> grade | 94 (20.1%)       | 174 (20.8%)      | 0.27             |
|                                              | Completed grade 12               | 88 (18.8%)       | 161 (19.3%)      |                  |
|                                              | Some college or technical school | 164 (35.0%)      | 310 (37.1%)      |                  |
|                                              | Completed 4 years of college     | 60 (12.8%)       | 113 (13.5%)      |                  |
|                                              | Some graduate training           | 62 (13.3%)       | 77 (9.2%)        |                  |
|                                              |                                  |                  |                  |                  |

\*Numbers do not always add up because of missing data.

\*\*p-values are calculated using Chisq test or Wilcoxon test.



**Table E4. Descriptive characteristics of the 436 selected compared to the 1398 non-selected CHS participants from Year 5**

|                                              |                                  | N=436       | N=1398      |           |
|----------------------------------------------|----------------------------------|-------------|-------------|-----------|
| Characteristics                              |                                  | Count (%)   | Count (%)   | p-value** |
| FeNO (median)                                |                                  | 10.0        | 9.3         | 0.02      |
| Age (mean(SD))                               |                                  | 10.3 (0.6)  | 10.3 (0.7)  | 0.98      |
| Male                                         |                                  | 211 (48.4%) | 690 (49.4%) | 0.73      |
| Race/Ethnicity                               | Hispanic White                   | 280 (64.2%) | 693 (59.1%) | 0.06      |
|                                              | Non-Hispanic White               | 156 (35.8%) | 480 (40.9%) |           |
| Exposed to maternal smoking <i>in utero</i>  |                                  | 15 (3.6%)   | 97 (7.4%)   | 0.005     |
| Exposure to paternal smoking <i>in utero</i> |                                  | 42 (10.0%)  | 214 (16.6%) | 0.001     |
| Exposure to secondhand smoke                 |                                  | 10 (2.5%)   | 53 (4.3%)   | 0.11      |
| Ever diagnosed with asthma                   |                                  | 77 (17.7%)  | 183 (13.1%) | 0.02      |
| Ever reported wheeze                         |                                  | 99 (26.1%)  | 277 (23.2%) | 0.25      |
| History of respiratory allergy               |                                  | 267 (61.4%) | 836 (59.8%) | 0.56      |
| Use of asthma medication                     |                                  | 49 (12.3%)  | 122 (10.0%) | 0.18      |
| Annual family income                         | ≤\$14,999                        | 61 (17.0%)  | 150 (13.0%) | 0.12      |
|                                              | \$15,000-\$49,999                | 104 (29.0%) | 377 (32.7%) |           |
|                                              | ≥\$50,000                        | 194 (54.0%) | 626 (54.3%) |           |
| Parent/guardian education                    | Less than 12 <sup>th</sup> grade | 95 (23.1%)  | 252 (19.4%) | 0.13      |
|                                              | Completed grade 12               | 70 (17.0%)  | 234 (18.0%) |           |
|                                              | Some college or technical school | 134 (32.6%) | 503 (38.8%) |           |
|                                              | Completed 4 years of college     | 62 (15.1%)  | 164 (12.6%) |           |
|                                              | Some graduate training           | 50 (12.2%)  | 144 (11.1%) |           |
|                                              |                                  |             |             |           |

\*Numbers do not always add up because of missing data.

\*\*p-values are calculated using Chisq test or Wilcoxon test.

Need to rename tables here and in text

**Table E5a. Spearman pairwise correlations for *NOS2A* CpG loci**

|            | <b>Position 1</b> | <b>Position 2</b> | <b>Position 3</b> | <b>Position 4</b> | <b>Position 5</b> | <b>Position 6</b> | <b>Position 7</b> |
|------------|-------------------|-------------------|-------------------|-------------------|-------------------|-------------------|-------------------|
| Position 1 | 1.00              | 0.46*             | 0.14*             | 0.06              | -0.06             | -0.09*            | -0.02             |
| Position 2 |                   | 1.00              | 0.06*             | 0.05              | 0.03              | -0.04             | -0.02             |
| Position 3 |                   |                   | 1.00              | 0.12*             | 0.07*             | -0.03             | 0.02              |
| Position 4 |                   |                   |                   | 1.00              | 0.34*             | 0.20*             | 0.25*             |
| Position 5 |                   |                   |                   |                   | 1.00              | 0.30*             | 0.42*             |
| Position 6 |                   |                   |                   |                   |                   | 1.00              | 0.35*             |
| Position 7 |                   |                   |                   |                   |                   |                   | 1.00              |

\*p<0.05

**Table E5b. Spearman pairwise correlations for *NOS1* and *NOS3* CpG loci**

|             |            | <i>NOS1</i>       |                   |                   | <i>NOS3</i>       |                   |
|-------------|------------|-------------------|-------------------|-------------------|-------------------|-------------------|
|             |            | <b>Position 1</b> | <b>Position 2</b> | <b>Position 3</b> | <b>Position 1</b> | <b>Position 2</b> |
| <i>NOS1</i> | Position 1 | 1.00              | 0.50*             | 0.63*             | -0.05             | -0.08*            |
|             | Position 2 |                   | 1.00              | 0.46*             | -0.02             | -0.05             |
|             | Position 3 |                   |                   | 1.00              | -0.08*            | -0.10*            |
| <i>NOS3</i> | Position 1 |                   |                   |                   | 1.00              | 0.41*             |
|             | Position 2 |                   |                   |                   |                   | 1.00              |

\*p<0.05

**Table E5c. Spearman pairwise correlations for *ARG* CpG loci**

|             |            | <i>ARG1</i>       |                   | <i>ARG2</i>       |                   |
|-------------|------------|-------------------|-------------------|-------------------|-------------------|
|             |            | <b>Position 1</b> | <b>Position 1</b> | <b>Position 2</b> | <b>Position 3</b> |
| <i>ARG1</i> | Position 1 | 1.00              | 0.01              | 0.05              | 0.08*             |
| <i>ARG2</i> | Position 1 |                   | 1.00              | 0.24*             | 0.27*             |
|             | Position 2 |                   |                   | 1.00              | 0.40*             |
|             | Position 3 |                   |                   |                   | 1.00              |

\*p<0.05

**Table E6. The association between percent DNA methylation of NOS genes and percent change in FeNO from linear regression models**

| Gene loci |                                 | Combined <sup>†</sup> |             | Asthmatics <sup>*</sup> |               | Non-Asthmatics <sup>*</sup> |             | P for interaction |
|-----------|---------------------------------|-----------------------|-------------|-------------------------|---------------|-----------------------------|-------------|-------------------|
|           |                                 | %differe<br>nce       | 95%CI       | %differe<br>nce         | 95%CI         | %differe<br>nce             | 95%CI       |                   |
| NOS1      | Average <sup>‡</sup>            | 0.2                   | (-0.8, 1.2) | -1.1                    | (-4.2, 2.1)   | 0.1                         | (-0.9, 1.1) | 0.92              |
|           | Position 1                      | -0.2                  | (-0.9, 0.6) | -1.0                    | (-3.1, 1.0)   | -0.2                        | (-0.9, 0.5) | 0.70              |
|           | Position 2                      | 0.5                   | (-0.6, 1.5) | 2.2                     | (-1.3, 5.8)   | 0.2                         | (-0.9, 1.3) | 0.46              |
|           | Position 3                      | 0.2                   | (-0.5, 0.9) | -1.3                    | (-3.6, 0.9)   | 0.2                         | (-0.5, 0.9) | 0.91              |
| NOS2A     | Promoter average <sup>§</sup>   | 1.3                   | (-0.9, 3.6) | 5.5                     | (-2.1, 13.7)  | 0.7                         | (-1.5, 3.0) | 0.72              |
|           | Position 1                      | 0.9                   | (-1.1, 2.9) | 0.8                     | (-5.7, 7.8)   | 1.2                         | (-0.9, 3.2) | 0.43              |
|           | Position 2                      | 0.9                   | (-0.8, 2.7) | 5.4                     | (-0.6, 11.9)  | 0.2                         | (-1.5, 1.9) | 0.23              |
|           | Position 3                      | -0.3                  | (-1.4, 0.8) | -1.2                    | (-5.0, 2.8)   | -0.6                        | (-1.7, 0.5) | 0.71              |
|           | CpG island average <sup>‡</sup> | 0.2                   | (-1.5, 1.9) | 0.4                     | (-7.8, 9.4)   | 0.3                         | (-1.3, 2.0) | 0.57              |
|           | Position 4                      | 0.04                  | (-1.3, 1.4) | 0.3                     | (-4.3, 5.0)   | 0.2                         | (-1.2, 1.6) | 0.62              |
|           | Position 5                      | 0.1                   | (-1.2, 1.4) | 4.0                     | (-3.2, 11.5)  | 0.03                        | (-1.2, 1.3) | 0.89              |
|           | Position 6                      | 0.7                   | (-1.0, 2.4) | -4.1                    | (-12.0, 4.5)  | 1.1                         | (-0.6, 2.7) | 0.26              |
|           | Position 7                      | -0.2                  | (-2.0, 1.7) | -0.7                    | (-11.9, 11.0) | 0.1                         | (-1.7, 1.9) | 0.59              |
|           | Average <sup>‡</sup>            | -0.2                  | (-1.0, 0.5) | 2.8                     | (-0.2, 5.8)   | -0.3                        | (-1.1, 0.5) | 0.56              |
| NOS3      | Position 1                      | -0.1                  | (-0.7, 0.5) | 1.7                     | (-0.6, 4.1)   | -0.2                        | (-0.8, 0.4) | 0.59              |
|           | Position 2                      | -0.3                  | (-1.0, 0.4) | 2.6                     | (-0.2, 5.5)   | -0.2                        | (-0.9, 0.5) | 0.69              |

\* Analyses are adjusted for age, sex, race, plate, town, month of DNA collection, asthma medicine used, and education.

† Analyses are adjusted for age, sex, race, plate, town, month of DNA collection, asthma medicine used, education, and asthma.

‡ Average methylation of multiple positions within the gene was used.

§ Only NOS2A positions 1 and 2 were used for the average, since Position 3 is not in the promoter but is located between exons 1 and 2

**Table E7. The association between % methylation of ARG genes and % change in FeNO, by wheeze status**

| Gene loci   | Ever Wheeze* |       |               | Non-Wheeze  |       |              | P-int† |      |
|-------------|--------------|-------|---------------|-------------|-------|--------------|--------|------|
|             | %difference  | 95%CI | N             | %difference | 95%CI | N            |        |      |
| <i>ARG1</i> | Position 1   | -2.5  | (-5.2, 0.3)   | 189         | 0.1   | (-1.0, 1.2)  | 646    | 0.09 |
| <i>ARG2</i> | Average‡     | -6.5  | (-11.3,-1.5)  | 176         | -1.7  | (-3.3, 0)    | 616    | 0.09 |
|             | Position 1   | -1.9  | (-5.2, 1.6)   | 176         | -1.4  | (-3.0, 0.2)  | 615    | 0.52 |
|             | Position 2   | -5.2  | (-8.9, -1.4)  | 176         | -2.0  | (-3.5, -0.4) | 615    | 0.08 |
|             | Position 3   | -5.9  | (-10.5, -1.1) | 176         | -2.1  | (-3.9, -0.3) | 616    | 0.09 |

\*Analyses are adjusted for age, sex, race, plate, town, month of DNA collection, asthma medicine used, and education.

†P-value testing the interaction between ARG DNA methylation and ever wheeze status in a model adjusted for age, sex, race, plate, town, month of DNA collection, asthma medicine used, education, and asthma.

‡Average methylation of three positions within ARG2 gene was used.

**Table E8. The association between % methylation of ARG genes and % change in FeNO by asthma medication use among asthmatics only**

| Gene loci              | Any medication use * |               |    | No medication use * |               |    | P-int** |
|------------------------|----------------------|---------------|----|---------------------|---------------|----|---------|
|                        | %diff<br>erence      | 95%CI         | N  | %diff<br>erence     | 95%CI         | N  |         |
| <i>ARG1</i> Position 1 | -5.8                 | (-11.1, -0.2) | 66 | -1.7                | (-6.4, 3.3)   | 53 | 0.78    |
| <i>ARG2</i> Average*** | -18.3                | (-28.3, -7.0) | 59 | -4.5                | (-12.0, 3.6)  | 50 | 0.15    |
| Position 1             | -20.1                | (-30.7, -8.0) | 59 | 2.9                 | (-4.6, 11.1)  | 50 | 0.12    |
| Position 2             | -6.2                 | (-16.5, 5.4)  | 59 | -4.0                | (-11.7, 4.3)  | 50 | 0.94    |
| Position 3             | -13.1                | (-20.1, -5.4) | 59 | -6.9                | (-12.0, -1.4) | 50 | 0.20    |

\*Analyses are adjusted for age, sex, race, plate, town, month of DNA collection, and education.

\*\*P-value testing the interaction between ARG DNA methylation and asthma medicine used status in a model adjusted for age, sex, race, plate, town, month of DNA collection, asthma medicine used, and education among asthmatics.

\*\*\*Average methylation of three positions within *ARG2* gene was used.
