# Supplementary material
Source: PubMed Central journal article supplement (PMC3172885)

## Figure Legends

**Figure E1.** Schematic view of CpG locus depicts exon-intron structure and position of selected PCR amplicons. *NOS1*(a), *NOS2* ‘promoter non-CpG islands’(b), *NOS2* ‘non-CpG island’ between exons 1 and 2 (c), *NOS2* ‘CpG islands’(d), *NOS3* (e), *ARG1* (f), *ARG2* (g). The chromosomal location of the first CpG that we examined is marked in the left side of the gene map. Figure legend is shown below.

Figure E1

a.

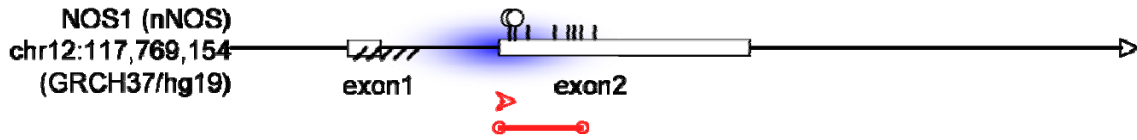

b.

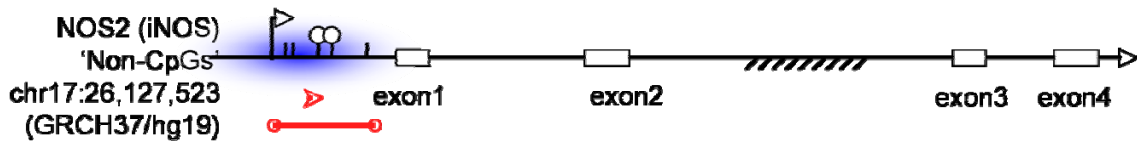

c.

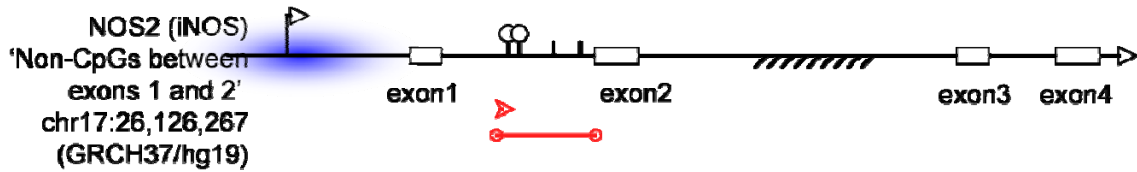

d.

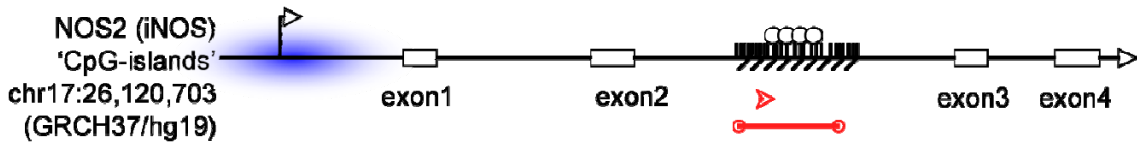

e.

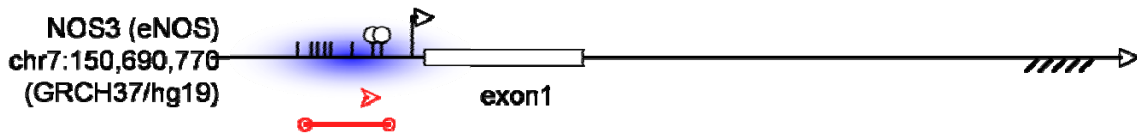

f.

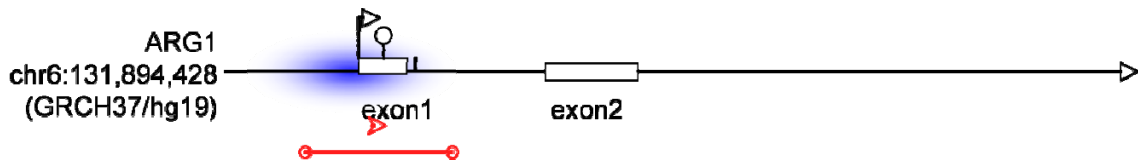

g.

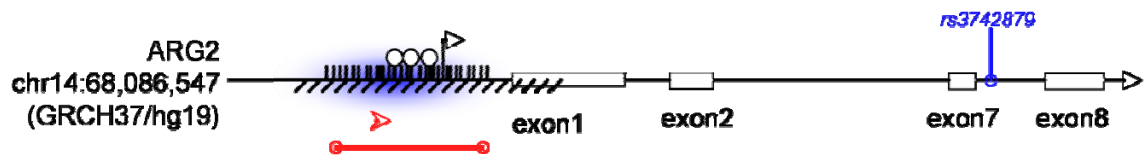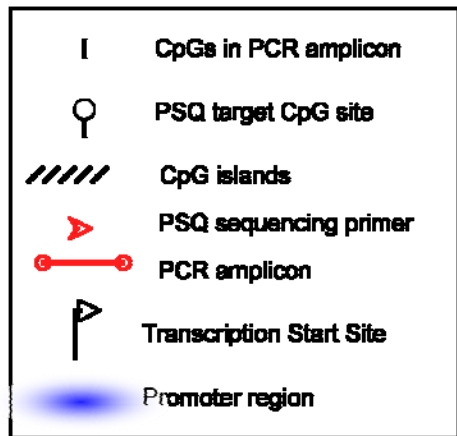

Supplement: supp_184_2_191__2.pdf [file supp_184_2_191__2.pdf]
